# Supplementary material
Source: HighWire-hosted journal article supplement (https://www.cmaj.ca/highwire/filestream/58106/field_highwire_adjunct_files/0/opals-stiell-online_appendix.pdf)
Supplement: opals-stiell-online_appendix.pdf [file opals-stiell-online_appendix.pdf]

**Appendix 1: Results of logistic regression analyses of factors predicting mortality at hospital discharge\***

| Factor                                                                                                         | B      | p value | OR (95% CI)   |
|----------------------------------------------------------------------------------------------------------------|--------|---------|---------------|
| <b>Model incorporating study phase and final revised trauma score as predictors of mortality (n = 2250)*</b>   |        |         |               |
| Intercept                                                                                                      | -1.83  | < 0.001 |               |
| Age, per 10 yr                                                                                                 | 0.60   | < 0.001 | 1.8 (1.7-2.0) |
| Injury severity score, per 10 units (min-max: 0-75)                                                            | 0.64   | < 0.001 | 1.9 (1.6-2.2) |
| Final assessment of revised trauma score,† per unit (min-max: 0-7.84)                                          | -0.76  | < 0.001 | 0.5 (0.4-0.5) |
| Time from receipt of call to arrive patient side, per minute                                                   | -0.003 | 0.81    | 1.0 (1.0-1.0) |
| Study phase (advanced v. basic life-support)                                                                   | 0.22   | 0.16    | 1.2 (0.9-1.7) |
| <b>Model incorporating study phase and initial revised trauma score as predictors of mortality (n = 2250)‡</b> |        |         |               |
| Intercept                                                                                                      | -2.84  | < 0.001 |               |
| Age, per 10 yr                                                                                                 | 0.64   | < 0.001 | 1.9 (1.8-2.1) |
| Injury severity score, per 10 units (min-max: 0-75)                                                            | 0.70   | < 0.001 | 2.0 (1.8-2.3) |
| Initial assessment of revised trauma score,§ per unit (min-max: 0-7.84)                                        | -0.73  | < 0.001 | 0.5 (0.4-0.5) |
| Time from receipt of call to arrive patient side, per minute                                                   | 0.005  | 0.68    | 1.0 (1.0-1.0) |
| Study phase (advanced v. basic life-support)                                                                   | 0.31   | 0.04    | 1.4 (1.0-1.9) |
| <b>Model incorporating advanced life-support at scene as predictor of mortality (n = 2250)¶</b>                |        |         |               |
| Intercept                                                                                                      | -3.01  | < 0.001 |               |
| Age, per 10 yr                                                                                                 | 0.65   | < 0.001 | 1.9 (1.8-2.1) |
| Injury severity score, per 10 units (min-max: 0-75)                                                            | 0.70   | < 0.001 | 2.0 (1.8-2.3) |
| Initial assessment of revised trauma score,§ per unit (min-max: 0-7.84)                                        | -0.72  | < 0.001 | 0.5 (0.4-0.5) |
| Time from receipt of call to arrive patient side, per minute                                                   | 0.006  | 0.64    | 1.0 (1.0-1.0) |
| Advanced life-support at scene                                                                                 | 0.40   | < 0.001 | 1.5 (1.1-2.0) |
| <b>Model incorporating advanced life-support interventions as predictors of mortality (n = 2425)**</b>         |        |         |               |
| Intercept                                                                                                      | -3.21  | < 0.001 |               |
| Age, per 10 yr                                                                                                 | 0.60   | < 0.001 | 1.8 (1.7-2.0) |
| Injury severity score, per 10 units (min-max: 0-75)                                                            | 0.69   | < 0.001 | 2.0 (1.8-2.3) |
| Initial assessment of Glasgow coma score§ (min-max: 0-15)                                                      | -0.24  | < 0.001 | 0.8 (0.8-0.8) |
| Initial assessment of systolic blood pressure,§ per unit                                                       | -0.006 | < 0.001 | 1.0 (1.0-1.0) |
| Time from receipt of call to arrive patient side, per minute                                                   | -0.002 | 0.85    | 1.0 (1.0-1.0) |
| Intubation at scene                                                                                            | 1.02   | < 0.001 | 2.8 (1.6-5.0) |
| Intravenous administration of fluid bolus at scene                                                             | -0.26  | 0.40    | 0.8 (0.4-1.4) |

Note: OR = odds ratio, CI = confidence interval.

\*The goodness of fit for this model was 5.88 (8 degrees of freedom),  $p = 0.67$ .

†Final assessment represents value from lead trauma hospital; if missing, value from scene was used.

‡The goodness of fit for this model was 6.43 (8 degrees of freedom),  $p = 0.60$ .

§Initial assessment represents value from scene; if missing, value from lead trauma hospital was used.

¶The goodness of fit for this model was 4.94 (8 degrees of freedom),  $p = 0.76$ .

\*\*The goodness of fit for this model was 11.04 (8 degrees of freedom),  $p = 0.20$ .
